# Supplementary material for: Temporary antimetabolite treatment hold boosts SARS-CoV-2 vaccination–specific humoral and cellular immunity in kidney transplant recipients
Source: JCI journal article supplement (doi:10.1172/jci.insight.157836), 2022-03-29
Supplement: sd1 [file 1]

# Supplemental Figure 1, Schrezenmeier et al.

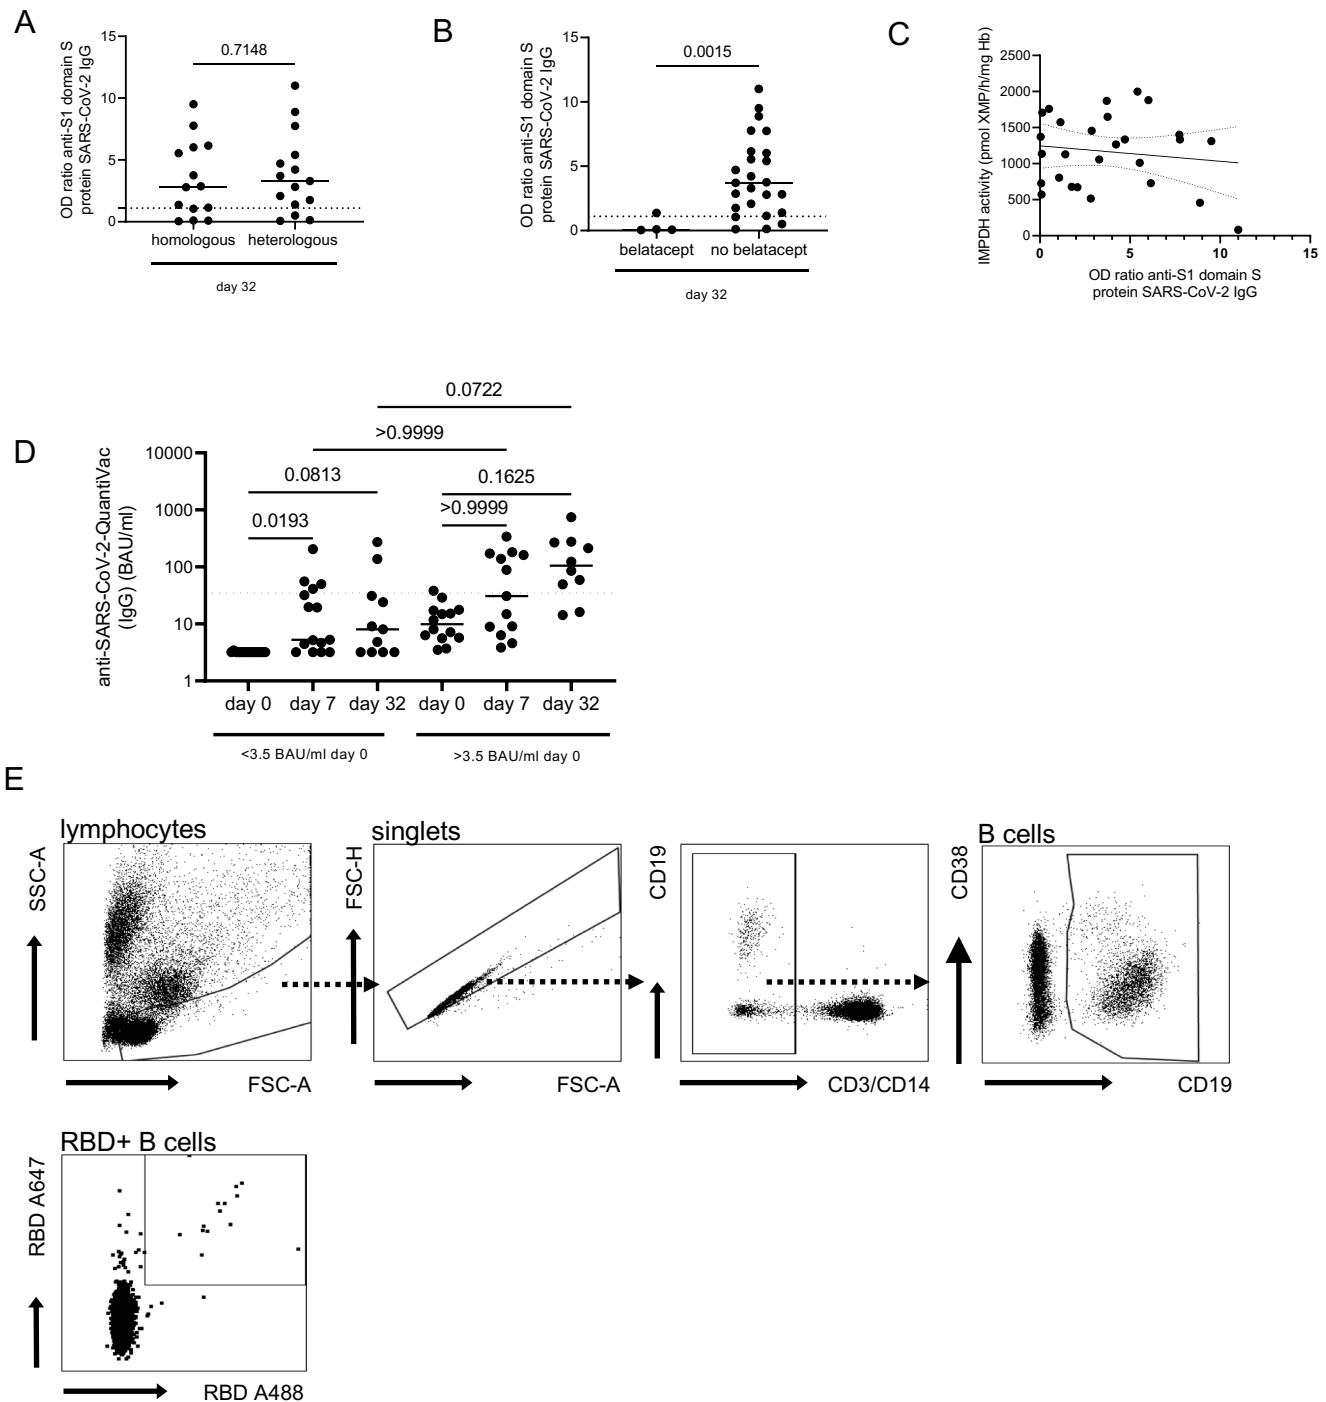

(A) Humoral vaccine-specific immune responses were assessed by ELISA for anti-spike protein S1 IgG and compared in patients with a homologous versus a heterologous previous vaccine protocol on day 32 after 4<sup>th</sup> vaccination. (B) Humoral vaccine-specific immune responses were assessed by ELISA for anti-spike protein S1 IgG and compared in patients with vs. without belatacept based immunosuppression on day 32 after 4<sup>th</sup> vaccination. The dotted lines mark the threshold for positivity (OD ratio of 1.1). (C) Correlation of inosine monophosphate dehydrogenase (IMPDH) activity in erythrocytes and anti-spike protein S1 IgG on day 32 after 4<sup>th</sup> vaccination. (D) Comparison of complete non-responders defined as IgG <3.5 BAU/ml (n=15) and partial non-responders IgG >3.5 BAU/ml (n=14) according to QuantiVac before 4<sup>th</sup> vaccination (complete cohort see Figure 1D) (E) Detection of SARS-CoV2 vaccine specific B cells. B cells in PBMCs were detected by flow cytometry. Antigen-specific B cells were identified by double staining with recombinant purified RBD conjugated to AF647 or AF488, respectively.

# Supplemental Figure 2, Schrezenmeier et al.

A

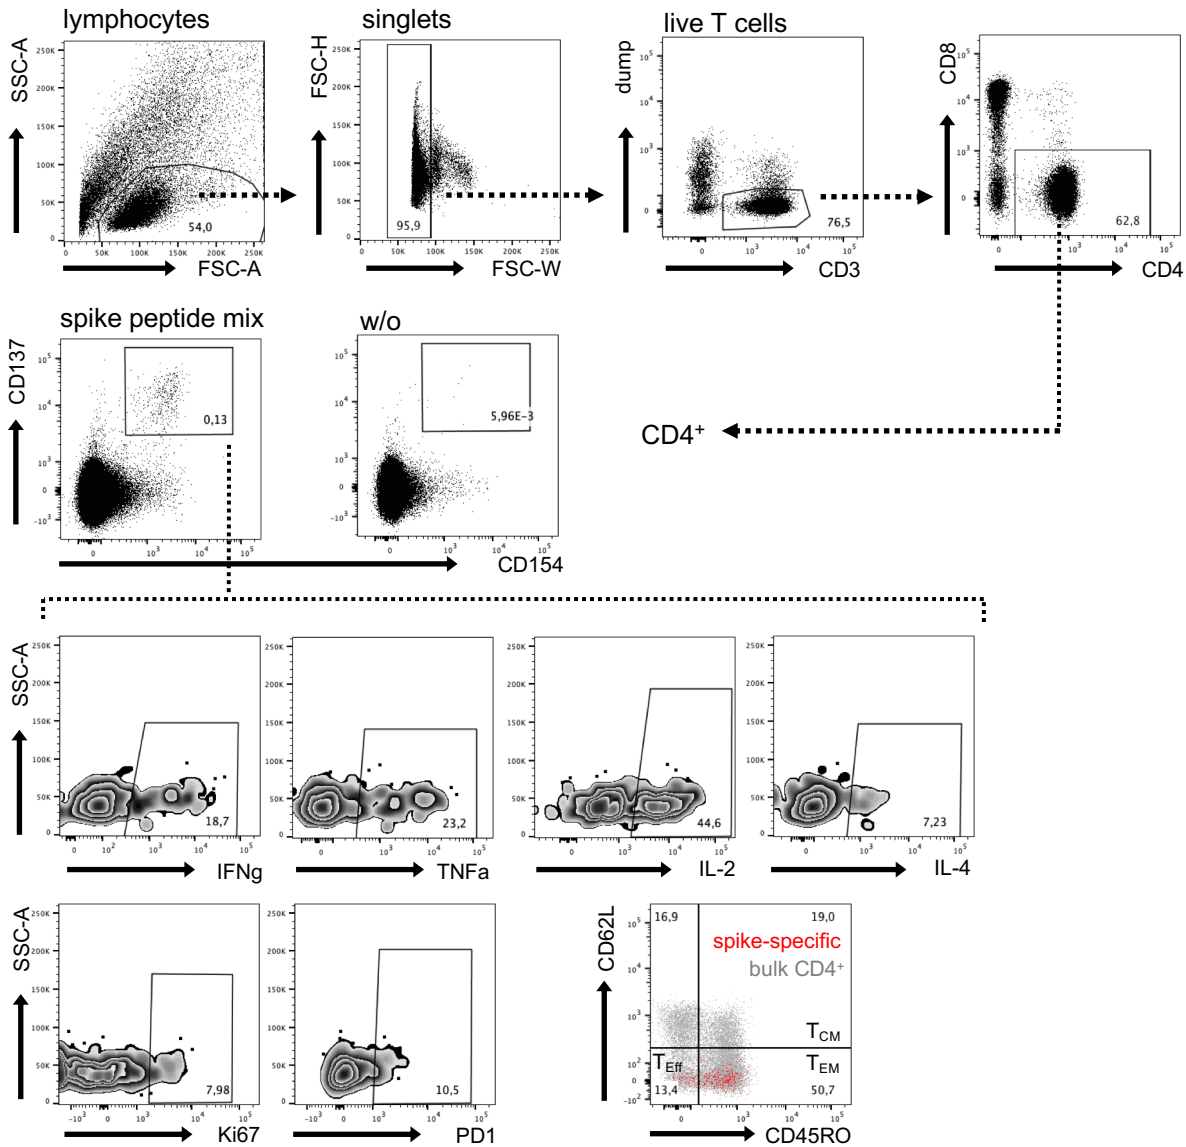

B

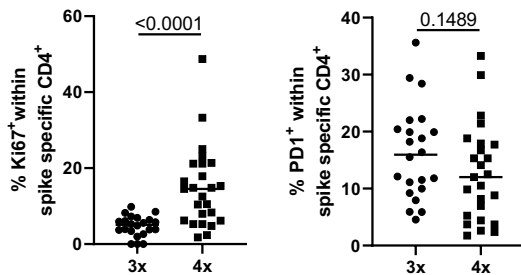

**Detection of SARS-CoV-2 vaccine specific T helper cells.** (A) Human PBMC were stimulated with SARS-CoV-2 spike peptide mix or left unstimulated for 16 h. Vaccine-specific live single CD14<sup>-</sup>CD19<sup>-</sup>CD3<sup>+</sup> (“dump” negative) CD4<sup>+</sup> T helper cells were detected by flow cytometry based on co-expression of CD154 and CD137. Specific cells were subsequently analyzed for expression of IFN $\gamma$ , TNF $\alpha$ , IL-2 and/or IL-4, for the in vivo induced proliferation/activation markers Ki67 and PD1, or for their memory phenotype based on CD45RO and CD62L expression ( $T_{CM}$ : central memory-,  $T_{EM}$ : effector memory-,  $T_{eff}$ : effector T cells). Gates were set according to the respective unstimulated or unstained controls. (B) Comparison of Ki67 and PD1 expression in spike specific CD4<sup>+</sup> T cells 1 week after the 3<sup>rd</sup> SARS-CoV2 dose under standard IS therapy (separate cohort) vs. 1 week after the 4<sup>th</sup> dose under mycophenolate hold (cohort that is examined in this publication throughout).
